# Supplementary material for: Understanding healthcare professionals’ responses to patient complaints in secondary and tertiary care in the UK: A systematic review and behavioural analysis
Source: Research Square preprint supplement (doi:10.21203/rs.3.rs-3193937/v1), 2023-11-20
Supplement: Supplementary file 1 [file 68ced71a9a10100586e25996.docx]

## Supplementary File 1: Search Strategies

**Systematic Review – Understanding influences on first response behaviour**

**Scopus**

| **#** | **Searches** |
| --- | --- |
| 1 | TITLE-ABS-KEY ("allied health" OR anesthetist* OR audiologist* OR caregiver* OR "case manager*" OR doulas OR "medical faculty" OR "nursing faculty" OR "health facility" OR administrator* OR "infection control" OR "medical chaperone*" OR "medical staff" OR nurse* OR "nursing staff" OR nutritionist* OR "occupational therapist*" OR optometrist* OR "hospital personnel" or pharmacist* OR "physical therapist*" OR physician* OR doctor* OR clinician* OR practitioner* OR "health service" OR "health facilit*") |
| 2 | TITLE-ABS ((respon* OR resolv* OR resolution* OR manag* OR handl* OR “deal* with”) W/2 complaint*) |
| 3 | KEY (complain*) |
| 4 | KEY (grievance) |
| 5 | ( TITLE-ABS ( ( respon* OR resolv* OR resolution* OR manag* OR handl* OR "deal* with" ) W/2 complaint* ) ) OR ( KEY ( complain* ) ) OR ( KEY ( grievance ) ) |
| 6 | (TITLE-ABS-KEY ("allied health" OR anesthetist* OR audiologist* OR caregiver* OR "case manager*" OR doulas OR "medical faculty" OR "nursing faculty" OR "health facility" OR administrator* OR "infection control" OR "medical chaperone*" OR "medical staff" OR nurse* OR "nursing staff" OR nutritionist* OR "occupational therapist*" OR optometrist* OR "hospital personnel" or pharmacist* OR "physical therapist*" OR physician* OR doctor* OR clinician* OR practitioner* OR "health service" OR "health facilit*")) AND ((TITLE-ABS ((respon* OR resolv* OR resolution* OR manag* OR handl* OR "deal* with") W/2 complaint*)) OR (KEY (complain*)) OR (KEY (grievance))) |
| 7 | TITLE-ABS ( ("allied health" OR anesthetist* OR audiologist* OR caregiver* OR "case manager*" OR doulas OR "medical faculty" OR "nursing faculty" OR "health facility" OR administrator* OR "infection control" OR "medical chaperone*" OR "medical staff" OR nurse* OR "nursing staff" OR nutritionist* OR "occupational therapist*" OR optometrist* OR "hospital personnel" OR pharmacist* OR "physical therapist*" OR physician* OR doctor* OR clinician* OR practitioner* OR "health service" OR "health facilit*") W/2 complain*) |
| 8 | ((TITLE-ABS-KEY ("allied health" OR anesthetist* OR audiologist* OR caregiver* OR "case manager*" OR doulas OR "medical faculty" OR "nursing faculty" OR "health facility" OR administrator* OR "infection control" OR "medical chaperone*" OR "medical staff" OR nurse* OR "nursing staff" OR nutritionist* OR "occupational therapist*" OR optometrist* OR "hospital personnel" or pharmacist* OR "physical therapist*" OR physician* OR doctor* OR clinician* OR practitioner* OR "health service" OR "health facilit*")) AND ((TITLE-ABS ((respon* OR resolv* OR resolution* OR manag* OR handl* OR "deal* with") W/2 complaint*)) OR (KEY (complain*)) OR (KEY (grievance)))) OR (TITLE-ABS ( ("allied health" OR anesthetist* OR audiologist* OR caregiver* OR "case manager*" OR doulas OR "medical faculty" OR "nursing faculty" OR "health facility" OR administrator* OR "infection control" OR "medical chaperone*" OR "medical staff" OR nurse* OR "nursing staff" OR nutritionist* OR "occupational therapist*" OR optometrist* OR "hospital personnel" OR pharmacist* OR "physical therapist*" OR physician* OR doctor* OR clinician* OR practitioner* OR "health service" OR "health facilit*") W/2 complain*)) |
| 9 | (TITLE-ABS ( "national health service*" ) OR TITLE-ABS (nhs* ) OR AFFIL( "national health service*" ) OR AFFIL(nhs* ) ) |
| 10 | (TITLE-ABS ( ( english AND NOT ( published OR publication* OR translat* OR written OR language* OR speak* OR literature OR citation* ) W/4 english ) ) ) |
| 11 | (TITLE-ABS( gb OR "g.b." OR britain* OR ( british* AND NOT "british columbia" ) OR uk OR "u.k." OR (united AND kingdom*) OR ( england* AND NOT "new england" ) OR (northern AND ireland*) OR (northern AND irish*) OR scotland* OR scottish* OR ( ( wales OR "south wales" ) AND NOT "new south wales" ) OR welsh* ) OR AFFIL( gb OR "g.b." OR britain* OR ( british* AND NOT "british columbia" ) OR uk OR "u.k." OR (united AND kingdom*) OR ( england* AND NOT "new england" ) OR (northern AND ireland*) OR (northern AND irish*) OR scotland* OR scottish* OR ( ( wales OR "south wales" ) AND NOT "new south wales" ) OR welsh* ) OR SRCTITLE( gb OR "g.b." OR britain* OR ( british* AND NOT "british columbia" ) OR uk OR "u.k." OR (united AND kingdom*) OR ( england* AND NOT "new england" ) OR (northern AND ireland*) OR (northern AND irish*) OR scotland* OR scottish* OR ( ( wales OR "south wales" ) AND NOT "new south wales" ) OR welsh* ) ) |
| 12 | TITLE-ABS(bath OR "bath's" OR (birmingham AND NOT alabama*) OR ("birmingham's" AND NOT alabama*) OR bradford OR "bradford's" OR brighton OR "brighton's" OR bristol OR "bristol's" OR carlisle* OR "carlisle's" OR (cambridge AND NOT (massachusetts* OR boston* OR harvard* ) ) OR ("cambridge's" AND NOT (massachusetts* OR boston* OR harvard*) ) OR (canterbury AND NOT zealand*) OR ("canterbury's" AND NOT zealand*) OR chelmsford OR "chelmsford's" OR chester OR "chester's" OR chichester OR "chichester's" OR coventry OR "coventry's" OR derby OR "derby's" OR (durham AND NOT (carolina* OR nc ) ) OR ("durham's" AND NOT (carolina* OR nc ) ) OR ely OR "ely's" OR exeter OR "exeter's" OR gloucester OR "gloucester's" OR hereford OR "hereford's" OR hull OR "hull's lancaster” OR "lancaster's" OR leeds* OR leicester OR "leicester's" OR (lincoln AND NOT nebraska*) or ("lincoln's" AND NOT nebraska*) OR (liverpool AND NOT (“new south wales*” OR nsw) ) OR ("liverpool's" AND NOT (“new south wales*” OR nsw ) ) OR (london AND NOT (ontario* OR ont OR toronto* ) ) OR ("london's" AND NOT (ontario* OR ont OR toronto*) ) OR manchester OR "manchester's" OR (newcastle AND NOT (“new south wales*” OR nsw ) ) OR ("newcastle's" AND NOT (“new south wales*” OR nsw ) ) OR norwich OR "norwich's" OR nottingham OR "nottingham's" OR oxford OR "oxford's" OR peterborough OR "peterborough's" OR plymouth OR "plymouth's" OR portsmouth OR "portsmouth's" OR preston OR "preston's" OR ripon OR "ripon's" OR salford OR "salford's" OR salisbury OR "salisbury's" OR sheffield OR "sheffield's" OR southampton OR "southampton's" OR "st albans" OR stoke OR "stoke's" OR sunderland OR "sunderland's" OR truro OR "truro's" OR wakefield OR "wakefield's" OR wells OR westminster OR "westminster's" OR winchester OR "winchester's" OR wolverhampton OR "wolverhampton's" OR (worcester AND NOT (massachusetts* OR boston* OR harvard*) ) OR ("worcester's" AND NOT (massachusetts* OR boston* OR harvard*) ) OR (york AND NOT ("new york*" OR ny OR ontario* OR ont OR toronto*) ) OR ("york's" AND NOT ("new york*" OR ny OR ontario* OR ont OR toronto*) ) ) OR AFFIL(bath OR "bath's" OR (birmingham AND NOT alabama*) OR ("birmingham's" AND NOT alabama*) OR bradford OR "bradford's" OR brighton OR "brighton's" OR bristol OR "bristol's" OR carlisle* OR "carlisle's" OR (cambridge AND NOT (massachusetts* OR boston* OR harvard* ) ) OR ("cambridge's" AND NOT (massachusetts* OR boston* OR harvard*) ) OR (canterbury AND NOT zealand*) OR ("canterbury's" AND NOT zealand*) OR chelmsford OR "chelmsford's" OR chester OR "chester's" OR chichester OR "chichester's" OR coventry OR "coventry's" OR derby OR "derby's" OR (durham AND NOT (carolina* OR nc ) ) OR ("durham's" AND NOT (carolina* OR nc ) ) OR ely OR "ely's" OR exeter OR "exeter's" OR gloucester OR "gloucester's" OR hereford OR "hereford's" OR hull OR "hull's lancaster” OR "lancaster's" OR leeds* OR leicester OR "leicester's" OR (lincoln AND NOT nebraska*) or ("lincoln's" AND NOT nebraska*) OR (liverpool AND NOT (“new south wales*” OR nsw) ) OR ("liverpool's" AND NOT (“new south wales*” OR nsw ) ) OR (london AND NOT (ontario* OR ont OR toronto* ) ) OR ("london's" AND NOT (ontario* OR ont OR toronto*) ) OR manchester OR "manchester's" OR (newcastle AND NOT (“new south wales*” OR nsw ) ) OR ("newcastle's" AND NOT (“new south wales*” OR nsw ) ) OR norwich OR "norwich's" OR nottingham OR "nottingham's" OR oxford OR "oxford's" OR peterborough OR "peterborough's" OR plymouth OR "plymouth's" OR portsmouth OR "portsmouth's" OR preston OR "preston's" OR ripon OR "ripon's" OR salford OR "salford's" OR salisbury OR "salisbury's" OR sheffield OR "sheffield's" OR southampton OR "southampton's" OR "st albans" OR stoke OR "stoke's" OR sunderland OR "sunderland's" OR truro OR "truro's" OR wakefield OR "wakefield's" OR wells OR westminster OR "westminster's" OR winchester OR "winchester's" OR wolverhampton OR "wolverhampton's" OR (worcester AND NOT (massachusetts* OR boston* OR harvard*) ) OR ("worcester's" AND NOT (massachusetts* OR boston* OR harvard*) ) OR (york AND NOT ("new york*" OR ny OR ontario* OR ont OR toronto*) ) OR ("york's" AND NOT ("new york*" OR ny OR ontario* OR ont OR toronto*) ) ) |
| 13 | TITLE-ABS (bangor OR "bangor's" OR cardiff OR "cardiff's" OR newport OR "newport's" OR “st asaph” OR "st asaph's" OR “st davids” OR swansea OR "swansea's") OR AFFIL(bangor OR "bangor's" OR cardiff OR "cardiff's" OR newport OR "newport's" OR “st asaph” OR "st asaph's" OR “st davids” OR swansea OR "swansea's") |
| 14 | TITLE-ABS (aberdeen OR "aberdeen's" OR dundee OR "dundee's" OR edinburgh OR "edinburgh's" OR glasgow OR "glasgow's" OR inverness OR (perth AND NOT australia*) OR ("perth's" AND NOT australia*) OR stirling OR "stirling's") OR AFFIL(aberdeen OR "aberdeen's" OR dundee OR "dundee's" OR edinburgh OR "edinburgh's" OR glasgow OR "glasgow's" OR inverness OR (perth AND NOT australia*) OR ("perth's" AND NOT australia*) OR stirling OR "stirling's") |
| 15 | TITLE-ABS (armagh OR "armagh's" OR belfast OR "belfast's" OR lisburn OR "lisburn's" OR londonderry OR "londonderry's" OR derry OR "derry's" OR newry OR "newry's") OR AFFIL(armagh OR "armagh's" OR belfast OR "belfast's" OR lisburn OR "lisburn's" OR londonderry OR "londonderry's" OR derry OR "derry's" OR newry OR "newry's") |
| 16 | ((TITLE-ABS ( "national health service*" ) OR TITLE-ABS ( nhs* ) OR AFFIL( "national health service*" ) OR AFFIL(nhs* ) )) OR ((TITLE-ABS ( ( english AND NOT ( published OR publication* OR translat* OR written OR language* OR speak* OR literature OR citation* ) W/4 english ) ) )) OR ((TITLE-ABS( gb OR "g.b." OR britain* OR ( british* AND NOT "british columbia" ) OR uk OR "u.k." OR (united AND kingdom*) OR ( england* AND NOT "new england" ) OR (northern AND ireland*) OR (northern AND irish*) OR scotland* OR scottish* OR ( ( wales OR "south wales" ) AND NOT "new south wales" ) OR welsh* ) OR AFFIL( gb OR "g.b." OR britain* OR ( british* AND NOT "british columbia" ) OR uk OR "u.k." OR (united AND kingdom*) OR ( england* AND NOT "new england" ) OR (northern AND ireland*) OR (northern AND irish*) OR scotland* OR scottish* OR ( ( wales OR "south wales" ) AND NOT "new south wales" ) OR welsh* ) OR SRCTITLE( gb OR "g.b." OR britain* OR ( british* AND NOT "british columbia" ) OR uk OR "u.k." OR (united AND kingdom*) OR ( england* AND NOT "new england" ) OR (northern AND ireland*) OR (northern AND irish*) OR scotland* OR scottish* OR ( ( wales OR "south wales" ) AND NOT "new south wales" ) OR welsh* ) )) OR (TITLE-ABS(bath OR "bath's" OR (birmingham AND NOT alabama*) OR ("birmingham's" AND NOT alabama*) OR bradford OR "bradford's" OR brighton OR "brighton's" OR bristol OR "bristol's" OR carlisle* OR "carlisle's" OR (cambridge AND NOT (massachusetts* OR boston* OR harvard* ) ) OR ("cambridge's" AND NOT (massachusetts* OR boston* OR harvard*) ) OR (canterbury AND NOT zealand*) OR ("canterbury's" AND NOT zealand*) OR chelmsford OR "chelmsford's" OR chester OR "chester's" OR chichester OR "chichester's" OR coventry OR "coventry's" OR derby OR "derby's" OR (durham AND NOT (carolina* OR nc ) ) OR ("durham's" AND NOT (carolina* OR nc ) ) OR ely OR "ely's" OR exeter OR "exeter's" OR gloucester OR "gloucester's" OR hereford OR "hereford's" OR hull OR "hull's lancaster" OR "lancaster's" OR leeds* OR leicester OR "leicester's" OR (lincoln AND NOT nebraska*) or ("lincoln's" AND NOT nebraska*) OR (liverpool AND NOT ("new south wales*" OR nsw) ) OR ("liverpool's" AND NOT ("new south wales*" OR nsw ) ) OR (london AND NOT (ontario* OR ont OR toronto* ) ) OR ("london's" AND NOT (ontario* OR ont OR toronto*) ) OR manchester OR "manchester's" OR (newcastle AND NOT ("new south wales*" OR nsw ) ) OR ("newcastle's" AND NOT ("new south wales*" OR nsw ) ) OR norwich OR "norwich's" OR nottingham OR "nottingham's" OR oxford OR "oxford's" OR peterborough OR "peterborough's" OR plymouth OR "plymouth's" OR portsmouth OR "portsmouth's" OR preston OR "preston's" OR ripon OR "ripon's" OR salford OR "salford's" OR salisbury OR "salisbury's" OR sheffield OR "sheffield's" OR southampton OR "southampton's" OR "st albans" OR stoke OR "stoke's" OR sunderland OR "sunderland's" OR truro OR "truro's" OR wakefield OR "wakefield's" OR wells OR westminster OR "westminster's" OR winchester OR "winchester's" OR wolverhampton OR "wolverhampton's" OR (worcester AND NOT (massachusetts* OR boston* OR harvard*) ) OR ("worcester's" AND NOT (massachusetts* OR boston* OR harvard*) ) OR (york AND NOT ("new york*" OR ny OR ontario* OR ont OR toronto*) ) OR ("york's" AND NOT ("new york*" OR ny OR ontario* OR ont OR toronto*) ) ) OR AFFIL(bath OR "bath's" OR (birmingham AND NOT alabama*) OR ("birmingham's" AND NOT alabama*) OR bradford OR "bradford's" OR brighton OR "brighton's" OR bristol OR "bristol's" OR carlisle* OR "carlisle's" OR (cambridge AND NOT (massachusetts* OR boston* OR harvard* ) ) OR ("cambridge's" AND NOT (massachusetts* OR boston* OR harvard*) ) OR (canterbury AND NOT zealand*) OR ("canterbury's" AND NOT zealand*) OR chelmsford OR "chelmsford's" OR chester OR "chester's" OR chichester OR "chichester's" OR coventry OR "coventry's" OR derby OR "derby's" OR (durham AND NOT (carolina* OR nc ) ) OR ("durham's" AND NOT (carolina* OR nc ) ) OR ely OR "ely's" OR exeter OR "exeter's" OR gloucester OR "gloucester's" OR hereford OR "hereford's" OR hull OR "hull's lancaster" OR "lancaster's" OR leeds* OR leicester OR "leicester's" OR (lincoln AND NOT nebraska*) or ("lincoln's" AND NOT nebraska*) OR (liverpool AND NOT ("new south wales*" OR nsw) ) OR ("liverpool's" AND NOT ("new south wales*" OR nsw ) ) OR (london AND NOT (ontario* OR ont OR toronto* ) ) OR ("london's" AND NOT (ontario* OR ont OR toronto*) ) OR manchester OR "manchester's" OR (newcastle AND NOT ("new south wales*" OR nsw ) ) OR ("newcastle's" AND NOT ("new south wales*" OR nsw ) ) OR norwich OR "norwich's" OR nottingham OR "nottingham's" OR oxford OR "oxford's" OR peterborough OR "peterborough's" OR plymouth OR "plymouth's" OR portsmouth OR "portsmouth's" OR preston OR "preston's" OR ripon OR "ripon's" OR salford OR "salford's" OR salisbury OR "salisbury's" OR sheffield OR "sheffield's" OR southampton OR "southampton's" OR "st albans" OR stoke OR "stoke's" OR sunderland OR "sunderland's" OR truro OR "truro's" OR wakefield OR "wakefield's" OR wells OR westminster OR "westminster's" OR winchester OR "winchester's" OR wolverhampton OR "wolverhampton's" OR (worcester AND NOT (massachusetts* OR boston* OR harvard*) ) OR ("worcester's" AND NOT (massachusetts* OR boston* OR harvard*) ) OR (york AND NOT ("new york*" OR ny OR ontario* OR ont OR toronto*) ) OR ("york's" AND NOT ("new york*" OR ny OR ontario* OR ont OR toronto*) ) )) OR (TITLE-ABS (bangor OR "bangor's" OR cardiff OR "cardiff's" OR newport OR "newport's" OR "st asaph" OR "st asaph's" OR "st davids" OR swansea OR "swansea's") OR AFFIL(bangor OR "bangor's" OR cardiff OR "cardiff's" OR newport OR "newport's" OR "st asaph" OR "st asaph's" OR "st davids" OR swansea OR "swansea's")) OR (TITLE-ABS (aberdeen OR "aberdeen's" OR dundee OR "dundee's" OR edinburgh OR "edinburgh's" OR glasgow OR "glasgow's" OR inverness OR (perth AND NOT australia*) OR ("perth's" AND NOT australia*) OR stirling OR "stirling's") OR AFFIL(aberdeen OR "aberdeen's" OR dundee OR "dundee's" OR edinburgh OR "edinburgh's" OR glasgow OR "glasgow's" OR inverness OR (perth AND NOT australia*) OR ("perth's" AND NOT australia*) OR stirling OR "stirling's")) OR (TITLE-ABS (armagh OR "armagh's" OR belfast OR "belfast's" OR lisburn OR "lisburn's" OR londonderry OR "londonderry's" OR derry OR "derry's" OR newry OR "newry's") OR AFFIL(armagh OR "armagh's" OR belfast OR "belfast's" OR lisburn OR "lisburn's" OR londonderry OR "londonderry's" OR derry OR "derry's" OR newry OR "newry's")) |
| 17 | (((TITLE-ABS-KEY ("allied health" OR anesthetist* OR audiologist* OR caregiver* OR "case manager*" OR doulas OR "medical faculty" OR "nursing faculty" OR "health facility" OR administrator* OR "infection control" OR "medical chaperone*" OR "medical staff" OR nurse* OR "nursing staff" OR nutritionist* OR "occupational therapist*" OR optometrist* OR "hospital personnel" or pharmacist* OR "physical therapist*" OR physician* OR doctor* OR clinician* OR practitioner* OR "health service" OR "health facilit*")) AND ((TITLE-ABS ((respon* OR resolv* OR resolution* OR manag* OR handl* OR "deal* with") W/2 complaint*)) OR (KEY (complain*)) OR (KEY (grievance)))) OR (TITLE-ABS ( ("allied health" OR anesthetist* OR audiologist* OR caregiver* OR "case manager*" OR doulas OR "medical faculty" OR "nursing faculty" OR "health facility" OR administrator* OR "infection control" OR "medical chaperone*" OR "medical staff" OR nurse* OR "nursing staff" OR nutritionist* OR "occupational therapist*" OR optometrist* OR "hospital personnel" OR pharmacist* OR "physical therapist*" OR physician* OR doctor* OR clinician* OR practitioner* OR "health service" OR "health facilit*") W/2 complain*))) AND (((TITLE-ABS ( "national health service*" ) OR TITLE-ABS ( nhs* ) OR AFFIL( "national health service*" ) OR AFFIL(nhs* ) )) OR ((TITLE-ABS ( ( english AND NOT ( published OR publication* OR translat* OR written OR language* OR speak* OR literature OR citation* ) W/4 english ) ) )) OR ((TITLE-ABS( gb OR "g.b." OR britain* OR ( british* AND NOT "british columbia" ) OR uk OR "u.k." OR (united AND kingdom*) OR ( england* AND NOT "new england" ) OR (northern AND ireland*) OR (northern AND irish*) OR scotland* OR scottish* OR ( ( wales OR "south wales" ) AND NOT "new south wales" ) OR welsh* ) OR AFFIL( gb OR "g.b." OR britain* OR ( british* AND NOT "british columbia" ) OR uk OR "u.k." OR (united AND kingdom*) OR ( england* AND NOT "new england" ) OR (northern AND ireland*) OR (northern AND irish*) OR scotland* OR scottish* OR ( ( wales OR "south wales" ) AND NOT "new south wales" ) OR welsh* ) OR SRCTITLE( gb OR "g.b." OR britain* OR ( british* AND NOT "british columbia" ) OR uk OR "u.k." OR (united AND kingdom*) OR ( england* AND NOT "new england" ) OR (northern AND ireland*) OR (northern AND irish*) OR scotland* OR scottish* OR ( ( wales OR "south wales" ) AND NOT "new south wales" ) OR welsh* ) )) OR (TITLE-ABS(bath OR "bath's" OR (birmingham AND NOT alabama*) OR ("birmingham's" AND NOT alabama*) OR bradford OR "bradford's" OR brighton OR "brighton's" OR bristol OR "bristol's" OR carlisle* OR "carlisle's" OR (cambridge AND NOT (massachusetts* OR boston* OR harvard* ) ) OR ("cambridge's" AND NOT (massachusetts* OR boston* OR harvard*) ) OR (canterbury AND NOT zealand*) OR ("canterbury's" AND NOT zealand*) OR chelmsford OR "chelmsford's" OR chester OR "chester's" OR chichester OR "chichester's" OR coventry OR "coventry's" OR derby OR "derby's" OR (durham AND NOT (carolina* OR nc ) ) OR ("durham's" AND NOT (carolina* OR nc ) ) OR ely OR "ely's" OR exeter OR "exeter's" OR gloucester OR "gloucester's" OR hereford OR "hereford's" OR hull OR "hull's lancaster" OR "lancaster's" OR leeds* OR leicester OR "leicester's" OR (lincoln AND NOT nebraska*) or ("lincoln's" AND NOT nebraska*) OR (liverpool AND NOT ("new south wales*" OR nsw) ) OR ("liverpool's" AND NOT ("new south wales*" OR nsw ) ) OR (london AND NOT (ontario* OR ont OR toronto* ) ) OR ("london's" AND NOT (ontario* OR ont OR toronto*) ) OR manchester OR "manchester's" OR (newcastle AND NOT ("new south wales*" OR nsw ) ) OR ("newcastle's" AND NOT ("new south wales*" OR nsw ) ) OR norwich OR "norwich's" OR nottingham OR "nottingham's" OR oxford OR "oxford's" OR peterborough OR "peterborough's" OR plymouth OR "plymouth's" OR portsmouth OR "portsmouth's" OR preston OR "preston's" OR ripon OR "ripon's" OR salford OR "salford's" OR salisbury OR "salisbury's" OR sheffield OR "sheffield's" OR southampton OR "southampton's" OR "st albans" OR stoke OR "stoke's" OR sunderland OR "sunderland's" OR truro OR "truro's" OR wakefield OR "wakefield's" OR wells OR westminster OR "westminster's" OR winchester OR "winchester's" OR wolverhampton OR "wolverhampton's" OR (worcester AND NOT (massachusetts* OR boston* OR harvard*) ) OR ("worcester's" AND NOT (massachusetts* OR boston* OR harvard*) ) OR (york AND NOT ("new york*" OR ny OR ontario* OR ont OR toronto*) ) OR ("york's" AND NOT ("new york*" OR ny OR ontario* OR ont OR toronto*) ) ) OR AFFIL(bath OR "bath's" OR (birmingham AND NOT alabama*) OR ("birmingham's" AND NOT alabama*) OR bradford OR "bradford's" OR brighton OR "brighton's" OR bristol OR "bristol's" OR carlisle* OR "carlisle's" OR (cambridge AND NOT (massachusetts* OR boston* OR harvard* ) ) OR ("cambridge's" AND NOT (massachusetts* OR boston* OR harvard*) ) OR (canterbury AND NOT zealand*) OR ("canterbury's" AND NOT zealand*) OR chelmsford OR "chelmsford's" OR chester OR "chester's" OR chichester OR "chichester's" OR coventry OR "coventry's" OR derby OR "derby's" OR (durham AND NOT (carolina* OR nc ) ) OR ("durham's" AND NOT (carolina* OR nc ) ) OR ely OR "ely's" OR exeter OR "exeter's" OR gloucester OR "gloucester's" OR hereford OR "hereford's" OR hull OR "hull's lancaster" OR "lancaster's" OR leeds* OR leicester OR "leicester's" OR (lincoln AND NOT nebraska*) or ("lincoln's" AND NOT nebraska*) OR (liverpool AND NOT ("new south wales*" OR nsw) ) OR ("liverpool's" AND NOT ("new south wales*" OR nsw ) ) OR (london AND NOT (ontario* OR ont OR toronto* ) ) OR ("london's" AND NOT (ontario* OR ont OR toronto*) ) OR manchester OR "manchester's" OR (newcastle AND NOT ("new south wales*" OR nsw ) ) OR ("newcastle's" AND NOT ("new south wales*" OR nsw ) ) OR norwich OR "norwich's" OR nottingham OR "nottingham's" OR oxford OR "oxford's" OR peterborough OR "peterborough's" OR plymouth OR "plymouth's" OR portsmouth OR "portsmouth's" OR preston OR "preston's" OR ripon OR "ripon's" OR salford OR "salford's" OR salisbury OR "salisbury's" OR sheffield OR "sheffield's" OR southampton OR "southampton's" OR "st albans" OR stoke OR "stoke's" OR sunderland OR "sunderland's" OR truro OR "truro's" OR wakefield OR "wakefield's" OR wells OR westminster OR "westminster's" OR winchester OR "winchester's" OR wolverhampton OR "wolverhampton's" OR (worcester AND NOT (massachusetts* OR boston* OR harvard*) ) OR ("worcester's" AND NOT (massachusetts* OR boston* OR harvard*) ) OR (york AND NOT ("new york*" OR ny OR ontario* OR ont OR toronto*) ) OR ("york's" AND NOT ("new york*" OR ny OR ontario* OR ont OR toronto*) ) )) OR (TITLE-ABS (bangor OR "bangor's" OR cardiff OR "cardiff's" OR newport OR "newport's" OR "st asaph" OR "st asaph's" OR "st davids" OR swansea OR "swansea's") OR AFFIL(bangor OR "bangor's" OR cardiff OR "cardiff's" OR newport OR "newport's" OR "st asaph" OR "st asaph's" OR "st davids" OR swansea OR "swansea's")) OR (TITLE-ABS (aberdeen OR "aberdeen's" OR dundee OR "dundee's" OR edinburgh OR "edinburgh's" OR glasgow OR "glasgow's" OR inverness OR (perth AND NOT australia*) OR ("perth's" AND NOT australia*) OR stirling OR "stirling's") OR AFFIL(aberdeen OR "aberdeen's" OR dundee OR "dundee's" OR edinburgh OR "edinburgh's" OR glasgow OR "glasgow's" OR inverness OR (perth AND NOT australia*) OR ("perth's" AND NOT australia*) OR stirling OR "stirling's")) OR (TITLE-ABS (armagh OR "armagh's" OR belfast OR "belfast's" OR lisburn OR "lisburn's" OR londonderry OR "londonderry's" OR derry OR "derry's" OR newry OR "newry's") OR AFFIL(armagh OR "armagh's" OR belfast OR "belfast's" OR lisburn OR "lisburn's" OR londonderry OR "londonderry's" OR derry OR "derry's" OR newry OR "newry's"))) |
| 18 | (((TITLE-ABS-KEY ("allied health" OR anesthetist* OR audiologist* OR caregiver* OR "case manager*" OR doulas OR "medical faculty" OR "nursing faculty" OR "health facility" OR administrator* OR "infection control" OR "medical chaperone*" OR "medical staff" OR nurse* OR "nursing staff" OR nutritionist* OR "occupational therapist*" OR optometrist* OR "hospital personnel" or pharmacist* OR "physical therapist*" OR physician* OR doctor* OR clinician* OR practitioner* OR "health service" OR "health facilit*")) AND ((TITLE-ABS ((respon* OR resolv* OR resolution* OR manag* OR handl* OR "deal* with") W/2 complaint*)) OR (KEY (complain*)) OR (KEY (grievance)))) OR (TITLE-ABS ( ("allied health" OR anesthetist* OR audiologist* OR caregiver* OR "case manager*" OR doulas OR "medical faculty" OR "nursing faculty" OR "health facility" OR administrator* OR "infection control" OR "medical chaperone*" OR "medical staff" OR nurse* OR "nursing staff" OR nutritionist* OR "occupational therapist*" OR optometrist* OR "hospital personnel" OR pharmacist* OR "physical therapist*" OR physician* OR doctor* OR clinician* OR practitioner* OR "health service" OR "health facilit*") W/2 complain*))) AND (((TITLE-ABS ( "national health service*" ) OR TITLE-ABS ( nhs* ) OR AFFIL( "national health service*" ) OR AFFIL(nhs* ) )) OR ((TITLE-ABS ( ( english AND NOT ( published OR publication* OR translat* OR written OR language* OR speak* OR literature OR citation* ) W/4 english ) ) )) OR ((TITLE-ABS( gb OR "g.b." OR britain* OR ( british* AND NOT "british columbia" ) OR uk OR "u.k." OR (united AND kingdom*) OR ( england* AND NOT "new england" ) OR (northern AND ireland*) OR (northern AND irish*) OR scotland* OR scottish* OR ( ( wales OR "south wales" ) AND NOT "new south wales" ) OR welsh* ) OR AFFIL( gb OR "g.b." OR britain* OR ( british* AND NOT "british columbia" ) OR uk OR "u.k." OR (united AND kingdom*) OR ( england* AND NOT "new england" ) OR (northern AND ireland*) OR (northern AND irish*) OR scotland* OR scottish* OR ( ( wales OR "south wales" ) AND NOT "new south wales" ) OR welsh* ) OR SRCTITLE( gb OR "g.b." OR britain* OR ( british* AND NOT "british columbia" ) OR uk OR "u.k." OR (united AND kingdom*) OR ( england* AND NOT "new england" ) OR (northern AND ireland*) OR (northern AND irish*) OR scotland* OR scottish* OR ( ( wales OR "south wales" ) AND NOT "new south wales" ) OR welsh* ) )) OR (TITLE-ABS(bath OR "bath's" OR (birmingham AND NOT alabama*) OR ("birmingham's" AND NOT alabama*) OR bradford OR "bradford's" OR brighton OR "brighton's" OR bristol OR "bristol's" OR carlisle* OR "carlisle's" OR (cambridge AND NOT (massachusetts* OR boston* OR harvard* ) ) OR ("cambridge's" AND NOT (massachusetts* OR boston* OR harvard*) ) OR (canterbury AND NOT zealand*) OR ("canterbury's" AND NOT zealand*) OR chelmsford OR "chelmsford's" OR chester OR "chester's" OR chichester OR "chichester's" OR coventry OR "coventry's" OR derby OR "derby's" OR (durham AND NOT (carolina* OR nc ) ) OR ("durham's" AND NOT (carolina* OR nc ) ) OR ely OR "ely's" OR exeter OR "exeter's" OR gloucester OR "gloucester's" OR hereford OR "hereford's" OR hull OR "hull's lancaster" OR "lancaster's" OR leeds* OR leicester OR "leicester's" OR (lincoln AND NOT nebraska*) or ("lincoln's" AND NOT nebraska*) OR (liverpool AND NOT ("new south wales*" OR nsw) ) OR ("liverpool's" AND NOT ("new south wales*" OR nsw ) ) OR (london AND NOT (ontario* OR ont OR toronto* ) ) OR ("london's" AND NOT (ontario* OR ont OR toronto*) ) OR manchester OR "manchester's" OR (newcastle AND NOT ("new south wales*" OR nsw ) ) OR ("newcastle's" AND NOT ("new south wales*" OR nsw ) ) OR norwich OR "norwich's" OR nottingham OR "nottingham's" OR oxford OR "oxford's" OR peterborough OR "peterborough's" OR plymouth OR "plymouth's" OR portsmouth OR "portsmouth's" OR preston OR "preston's" OR ripon OR "ripon's" OR salford OR "salford's" OR salisbury OR "salisbury's" OR sheffield OR "sheffield's" OR southampton OR "southampton's" OR "st albans" OR stoke OR "stoke's" OR sunderland OR "sunderland's" OR truro OR "truro's" OR wakefield OR "wakefield's" OR wells OR westminster OR "westminster's" OR winchester OR "winchester's" OR wolverhampton OR "wolverhampton's" OR (worcester AND NOT (massachusetts* OR boston* OR harvard*) ) OR ("worcester's" AND NOT (massachusetts* OR boston* OR harvard*) ) OR (york AND NOT ("new york*" OR ny OR ontario* OR ont OR toronto*) ) OR ("york's" AND NOT ("new york*" OR ny OR ontario* OR ont OR toronto*) ) ) OR AFFIL(bath OR "bath's" OR (birmingham AND NOT alabama*) OR ("birmingham's" AND NOT alabama*) OR bradford OR "bradford's" OR brighton OR "brighton's" OR bristol OR "bristol's" OR carlisle* OR "carlisle's" OR (cambridge AND NOT (massachusetts* OR boston* OR harvard* ) ) OR ("cambridge's" AND NOT (massachusetts* OR boston* OR harvard*) ) OR (canterbury AND NOT zealand*) OR ("canterbury's" AND NOT zealand*) OR chelmsford OR "chelmsford's" OR chester OR "chester's" OR chichester OR "chichester's" OR coventry OR "coventry's" OR derby OR "derby's" OR (durham AND NOT (carolina* OR nc ) ) OR ("durham's" AND NOT (carolina* OR nc ) ) OR ely OR "ely's" OR exeter OR "exeter's" OR gloucester OR "gloucester's" OR hereford OR "hereford's" OR hull OR "hull's lancaster" OR "lancaster's" OR leeds* OR leicester OR "leicester's" OR (lincoln AND NOT nebraska*) or ("lincoln's" AND NOT nebraska*) OR (liverpool AND NOT ("new south wales*" OR nsw) ) OR ("liverpool's" AND NOT ("new south wales*" OR nsw ) ) OR (london AND NOT (ontario* OR ont OR toronto* ) ) OR ("london's" AND NOT (ontario* OR ont OR toronto*) ) OR manchester OR "manchester's" OR (newcastle AND NOT ("new south wales*" OR nsw ) ) OR ("newcastle's" AND NOT ("new south wales*" OR nsw ) ) OR norwich OR "norwich's" OR nottingham OR "nottingham's" OR oxford OR "oxford's" OR peterborough OR "peterborough's" OR plymouth OR "plymouth's" OR portsmouth OR "portsmouth's" OR preston OR "preston's" OR ripon OR "ripon's" OR salford OR "salford's" OR salisbury OR "salisbury's" OR sheffield OR "sheffield's" OR southampton OR "southampton's" OR "st albans" OR stoke OR "stoke's" OR sunderland OR "sunderland's" OR truro OR "truro's" OR wakefield OR "wakefield's" OR wells OR westminster OR "westminster's" OR winchester OR "winchester's" OR wolverhampton OR "wolverhampton's" OR (worcester AND NOT (massachusetts* OR boston* OR harvard*) ) OR ("worcester's" AND NOT (massachusetts* OR boston* OR harvard*) ) OR (york AND NOT ("new york*" OR ny OR ontario* OR ont OR toronto*) ) OR ("york's" AND NOT ("new york*" OR ny OR ontario* OR ont OR toronto*) ) )) OR (TITLE-ABS (bangor OR "bangor's" OR cardiff OR "cardiff's" OR newport OR "newport's" OR "st asaph" OR "st asaph's" OR "st davids" OR swansea OR "swansea's") OR AFFIL(bangor OR "bangor's" OR cardiff OR "cardiff's" OR newport OR "newport's" OR "st asaph" OR "st asaph's" OR "st davids" OR swansea OR "swansea's")) OR (TITLE-ABS (aberdeen OR "aberdeen's" OR dundee OR "dundee's" OR edinburgh OR "edinburgh's" OR glasgow OR "glasgow's" OR inverness OR (perth AND NOT australia*) OR ("perth's" AND NOT australia*) OR stirling OR "stirling's") OR AFFIL(aberdeen OR "aberdeen's" OR dundee OR "dundee's" OR edinburgh OR "edinburgh's" OR glasgow OR "glasgow's" OR inverness OR (perth AND NOT australia*) OR ("perth's" AND NOT australia*) OR stirling OR "stirling's")) OR (TITLE-ABS (armagh OR "armagh's" OR belfast OR "belfast's" OR lisburn OR "lisburn's" OR londonderry OR "londonderry's" OR derry OR "derry's" OR newry OR "newry's") OR AFFIL(armagh OR "armagh's" OR belfast OR "belfast's" OR lisburn OR "lisburn's" OR londonderry OR "londonderry's" OR derry OR "derry's" OR newry OR "newry's"))) AND PUBYEAR > 2000 |

NB: Could not apply MESH terms in Scopus

**Medline**

| **#** | **Searches** |
| --- | --- |
| 1 | exp Health Personnel/ |
| 2 | ("allied health" or anesthetist* or "health service" or "health facilit*" or audiologist* or caregiver* or "case manager*" or doulas or "medical faculty" or "nursing faculty" or "health facility" or administrator* or "infection control" or "medical chaperone*" or "medical staff" or nurse* or "nursing staff" or nutritionist* or "occupational therapist*" or optometrist* or "hospital personnel" or pharmacist* or "physical therapist*" or physician* or doctor* or clinician* or practitioner*).tw. |
| 3 | 1 or 2 |
| 4 | (("allied health" or anesthetist* or "health service" or "health facilit*" or audiologist* or caregiver* or "case manager*" or doulas or "medical faculty" or "nursing faculty" or "health facility" or administrator* or "infection control" or "medical chaperone*" or "medical staff" or nurse* or "nursing staff" or nutritionist* or "occupational therapist*" or optometrist* or "hospital personnel" or pharmacist* or "physical therapist*" or physician* or doctor* or clinician* or practitioner*) adj3 complaint*).tw. |
| 5 | ((respon* or resolv* or resolution* or manag* or handl* or "deal* with") adj3 complaint*).tw. |
| 6 | complain*.kf. |
| 7 | grievance.kf. |
| 8 | 5 or 6 or 7 |
| 9 | 3 and 8 |
| 10 | 4 or 9 |
| 11 | exp United Kingdom/ |
| 12 | (national health service* or nhs*).ti,ab,in. |
| 13 | (english not ((published or publication* or translat* or written or language* or speak* or literature or citation*) adj5 english)).ti,ab. |
| 14 | (gb or "g.b." or britain* or (british* not "british columbia") or uk or "u.k." or united kingdom* or (england* not "new england") or northern ireland* or northern irish* or scotland* or scottish* or ((wales or "south wales") not "new south wales") or welsh*).ti,ab,jw,in. |
| 15 | (bath or "bath's" or ((birmingham not alabama*) or ("birmingham's" not alabama*) or bradford or "bradford's" or brighton or "brighton's" or bristol or "bristol's" or carlisle* or "carlisle's" or (cambridge not (massachusetts* or boston* or harvard*)) or ("cambridge's" not (massachusetts* or boston* or harvard*)) or (canterbury not zealand*) or ("canterbury's" not zealand*) or chelmsford or "chelmsford's" or chester or "chester's" or chichester or "chichester's" or coventry or "coventry's" or derby or "derby's" or (durham not (carolina* or nc)) or ("durham's" not (carolina* or nc)) or ely or "ely's" or exeter or "exeter's" or gloucester or "gloucester's" or hereford or "hereford's" or hull or "hull's" or lancaster or "lancaster's" or leeds* or leicester or "leicester's" or (lincoln not nebraska*) or ("lincoln's" not nebraska*) or (liverpool not (new south wales* or nsw)) or ("liverpool's" not (new south wales* or nsw)) or ((london not (ontario* or ont or toronto*)) or ("london's" not (ontario* or ont or toronto*)) or manchester or "manchester's" or (newcastle not (new south wales* or nsw)) or ("newcastle's" not (new south wales* or nsw)) or norwich or "norwich's" or nottingham or "nottingham's" or oxford or "oxford's" or peterborough or "peterborough's" or plymouth or "plymouth's" or portsmouth or "portsmouth's" or preston or "preston's" or ripon or "ripon's" or salford or "salford's" or salisbury or "salisbury's" or sheffield or "sheffield's" or southampton or "southampton's" or st albans or stoke or "stoke's" or sunderland or "sunderland's" or truro or "truro's" or wakefield or "wakefield's" or wells or westminster or "westminster's" or winchester or "winchester's" or wolverhampton or "wolverhampton's" or (worcester not (massachusetts* or boston* or harvard*)) or ("worcester's" not (massachusetts* or boston* or harvard*)) or (york not ("new york*" or ny or ontario* or ont or toronto*)) or ("york's" not ("new york*" or ny or ontario* or ont or toronto*))))).ti,ab,in. |
| 16 | (bangor or "bangor's" or cardiff or "cardiff's" or newport or "newport's" or st asaph or "st asaph's" or st davids or swansea or "swansea's").ti,ab,in. |
| 17 | (aberdeen or "aberdeen's" or dundee or "dundee's" or edinburgh or "edinburgh's" or glasgow or "glasgow's" or inverness or (perth not australia*) or ("perth's" not australia*) or stirling or "stirling's").ti,ab,in. |
| 18 | (armagh or "armagh's" or belfast or "belfast's" or lisburn or "lisburn's" or londonderry or "londonderry's" or derry or "derry's" or newry or "newry's").ti,ab,in. |
| 19 | 11 or 12 or 13 or 14 or 15 or 16 or 17 or 18 |
| 20 | (exp africa/ or exp americas/ or exp antarctic regions/ or exp arctic regions/ or exp asia/ or exp australia/ or exp oceania/) not (exp United Kingdom/ or europe/) |
| 21 | 19 not 20 |
| 22 | 10 and 21 |
| 23 | Limit to 2001-2021 |

**Embase**

| **#** | **Searches** |
| --- | --- |
| 1 | exp Health Personnel/ |
| 2 | ("allied health" or anesthetist* or "health service" or "health facilit*" or audiologist* or caregiver* or "case manager*" or doulas or "medical faculty" or "nursing faculty" or "health facility" or administrator* or "infection control" or "medical chaperone*" or "medical staff" or nurse* or "nursing staff" or nutritionist* or "occupational therapist*" or optometrist* or "hospital personnel" or pharmacist* or "physical therapist*" or physician* or doctor* or clinician* or practitioner*).tw. |
| 3 | 1 or 2 |
| 4 | (("allied health" or anesthetist* or "health service" or "health facilit*" or audiologist* or caregiver* or "case manager*" or doulas or "medical faculty" or "nursing faculty" or "health facility" or administrator* or "infection control" or "medical chaperone*" or "medical staff" or nurse* or "nursing staff" or nutritionist* or "occupational therapist*" or optometrist* or "hospital personnel" or pharmacist* or "physical therapist*" or physician* or doctor* or clinician* or practitioner*) adj3 complaint*).tw. |
| 5 | ((respon* or resolv* or resolution* or manag* or handl* or "deal* with") adj3 complaint*).tw. |
| 6 | complain*.kw. |
| 7 | grievance.kw. |
| 8 | 5 or 6 or 7 |
| 9 | 3 and 8 |
| 10 | 4 or 9 |
| 11 | exp United Kingdom/ |
| 12 | (national health service* or nhs*).ti,ab,in. |
| 13 | (english not ((published or publication* or translat* or written or language* or speak* or literature or citation*) adj5 english)).ti,ab. |
| 14 | (gb or "g.b." or britain* or (british* not "british columbia") or uk or "u.k." or united kingdom* or (england* not "new england") or northern ireland* or northern irish* or scotland* or scottish* or ((wales or "south wales") not "new south wales") or welsh*).ti,ab,jw,in. |
| 15 | (bath or "bath's" or ((birmingham not alabama*) or ("birmingham's" not alabama*) or bradford or "bradford's" or brighton or "brighton's" or bristol or "bristol's" or carlisle* or "carlisle's" or (cambridge not (massachusetts* or boston* or harvard*)) or ("cambridge's" not (massachusetts* or boston* or harvard*)) or (canterbury not zealand*) or ("canterbury's" not zealand*) or chelmsford or "chelmsford's" or chester or "chester's" or chichester or "chichester's" or coventry or "coventry's" or derby or "derby's" or (durham not (carolina* or nc)) or ("durham's" not (carolina* or nc)) or ely or "ely's" or exeter or "exeter's" or gloucester or "gloucester's" or hereford or "hereford's" or hull or "hull's" or lancaster or "lancaster's" or leeds* or leicester or "leicester's" or (lincoln not nebraska*) or ("lincoln's" not nebraska*) or (liverpool not (new south wales* or nsw)) or ("liverpool's" not (new south wales* or nsw)) or ((london not (ontario* or ont or toronto*)) or ("london's" not (ontario* or ont or toronto*)) or manchester or "manchester's" or (newcastle not (new south wales* or nsw)) or ("newcastle's" not (new south wales* or nsw)) or norwich or "norwich's" or nottingham or "nottingham's" or oxford or "oxford's" or peterborough or "peterborough's" or plymouth or "plymouth's" or portsmouth or "portsmouth's" or preston or "preston's" or ripon or "ripon's" or salford or "salford's" or salisbury or "salisbury's" or sheffield or "sheffield's" or southampton or "southampton's" or st albans or stoke or "stoke's" or sunderland or "sunderland's" or truro or "truro's" or wakefield or "wakefield's" or wells or westminster or "westminster's" or winchester or "winchester's" or wolverhampton or "wolverhampton's" or (worcester not (massachusetts* or boston* or harvard*)) or ("worcester's" not (massachusetts* or boston* or harvard*)) or (york not ("new york*" or ny or ontario* or ont or toronto*)) or ("york's" not ("new york*" or ny or ontario* or ont or toronto*))))).ti,ab,in. |
| 16 | (bangor or "bangor's" or cardiff or "cardiff's" or newport or "newport's" or st asaph or "st asaph's" or st davids or swansea or "swansea's").ti,ab,in. |
| 17 | (aberdeen or "aberdeen's" or dundee or "dundee's" or edinburgh or "edinburgh's" or glasgow or "glasgow's" or inverness or (perth not australia*) or ("perth's" not australia*) or stirling or "stirling's").ti,ab,in. |
| 18 | (armagh or "armagh's" or belfast or "belfast's" or lisburn or "lisburn's" or londonderry or "londonderry's" or derry or "derry's" or newry or "newry's").ti,ab,in. |
| 19 | 11 or 12 or 13 or 14 or 15 or 16 or 17 or 18 |
| 20 | (exp africa/ or exp americas/ or exp antarctic regions/ or exp arctic regions/ or exp asia/ or exp australia/ or exp oceania/) not (exp United Kingdom/ or europe/) |
| 21 | 19 not 20 |
| 22 | 10 and 21 |
| 23 | Limit to 2001-2021 |

**CINAHL Plus**

| **#** | **Searches** |
| --- | --- |
| **1** | (MH “Health Personnel+”) |
| 2 | TI ( "allied health" OR anesthetist* OR audiologist* OR caregiver* OR "case manager*" OR doulas OR "medical faculty" OR "nursing faculty" OR "health facility" OR administrator* OR "infection control" OR "medical chaperone*" OR "medical staff" OR nurse* OR "nursing staff" OR nutritionist* OR "occupational therapist*" OR optometrist* OR "hospital personnel" or pharmacist* OR "physical therapist*" OR physician* OR doctor* OR clinician* OR practitioner* OR "health service" OR "health facilit*" ) OR AB ( "allied health" OR anesthetist* OR audiologist* OR caregiver* OR "case manager*" OR doulas OR "medical faculty" OR "nursing faculty" OR "health facility" OR administrator* OR "infection control" OR "medical chaperone*" OR "medical staff" OR nurse* OR "nursing staff" OR nutritionist* OR "occupational therapist*" OR optometrist* OR "hospital personnel" or pharmacist* OR "physical therapist*" OR physician* OR doctor* OR clinician* OR practitioner* OR "health service" OR "health facilit*" ) |
| 3 | S1 OR S2 |
| 4 | TI ( ("allied health" or anesthetist* or "health service" or "health facilit*" or audiologist* or caregiver* or "case manager*" or doulas or "medical faculty" or "nursing faculty" or "health facility" or administrator* or "infection control" or "medical chaperone*" or "medical staff" or nurse* or "nursing staff" or nutritionist* or "occupational therapist*" or optometrist* or "hospital personnel" or pharmacist* or "physical therapist*" or physician* or doctor* or clinician* or practitioner*) N3 complaint*) OR AB ( ("allied health" or anesthetist* or "health service" or "health facilit*" or audiologist* or caregiver* or "case manager*" or doulas or "medical faculty" or "nursing faculty" or "health facility" or administrator* or "infection control" or "medical chaperone*" or "medical staff" or nurse* or "nursing staff" or nutritionist* or "occupational therapist*" or optometrist* or "hospital personnel" or pharmacist* or "physical therapist*" or physician* or doctor* or clinician* or practitioner*) N3 complaint*) |
| 5 | TI ( ( respon* OR resolv* OR resolution* OR manag* OR handl* OR “deal* with” ) N3 complaint*) OR AB ( ( respon* OR resolv* OR resolution* OR manag* OR handl* OR “deal* with” ) N3 complaint*) |
| 6 | TI complain* |
| 7 | TI grievance |
| 8 | S5 OR S6 OR S7 |
| 9 | S3 AND S8 |
| 10 | S4 OR S9 |
| 11 | (MH “United Kingdom+”) |
| 12 | TI (“national health service*” or nhs*) OR AB (“national health service*” or nhs*) OR AF (“national health service*” or nhs*) |
| 13 | TI (english NOT ((published or publication* or translat* or written or language* or speak* or literature or citation*) N5 english)) OR AB (english NOT ((published or publication* or translat* or written or language* or speak* or literature or citation*) N5 english)) |
| 14 | TI (gb or "g.b." or britain* or (british* NOT "british columbia") or uk or "u.k." or “united kingdom*” or (england* not "new england") or “northern ireland*” or “northern irish*” or scotland* or scottish* or ((wales or "south wales") NOT "new south wales") or welsh*) OR AB (gb or "g.b." or britain* or (british* NOT "british columbia") or uk or "u.k." or “united kingdom*” or (england* NOT "new england") or “northern ireland*” or “northern irish*” or scotland* or scottish* or ((wales or "south wales") NOT "new south wales") or welsh*) OR AF (gb or "g.b." or britain* or (british* NOT "british columbia") or uk or "u.k." or “united kingdom*” or (england* NOT "new england") or “northern ireland*” or “northern irish*” or scotland* or scottish* or ((wales or "south wales") NOT "new south wales") or welsh*) OR SO (gb or "g.b." or britain* or (british* NOT "british columbia") or uk or "u.k." or “united kingdom*” or (england* NOT "new england") or “northern ireland*” or “northern irish*” or scotland* or scottish* or ((wales or "south wales") NOT "new south wales") or welsh*) |
| 15 | TI (bath or "bath's" or ((birmingham not alabama*) or ("birmingham's" not alabama*) or bradford or "bradford's" or brighton or "brighton's" or bristol or "bristol's" or carlisle* or "carlisle's" or (cambridge not (massachusetts* or boston* or harvard*)) or ("cambridge's" not (massachusetts* or boston* or harvard*)) or (canterbury not zealand*) or ("canterbury's" not zealand*) or chelmsford or "chelmsford's" or chester or "chester's" or chichester or "chichester's" or coventry or "coventry's" or derby or "derby's" or (durham not (carolina* or nc)) or ("durham's" not (carolina* or nc)) or ely or "ely's" or exeter or "exeter's" or gloucester or "gloucester's" or hereford or "hereford's" or hull or "hull's" or lancaster or "lancaster's" or leeds* or leicester or "leicester's" or (lincoln not nebraska*) or ("lincoln's" not nebraska*) or (liverpool not (“new south wales*” or nsw)) or ("liverpool's" not (“new south wales*” or nsw)) or ((london not (ontario* or ont or toronto*)) or ("london's" not (ontario* or ont or toronto*)) or manchester or "manchester's" or (newcastle not (“new south wales*” or nsw)) or ("newcastle's" not (“new south wales*” or nsw)) or norwich or "norwich's" or nottingham or "nottingham's" or oxford or "oxford's" or peterborough or "peterborough's" or plymouth or "plymouth's" or portsmouth or "portsmouth's" or preston or "preston's" or ripon or "ripon's" or salford or "salford's" or salisbury or "salisbury's" or sheffield or "sheffield's" or southampton or "southampton's" or “st albans” or stoke or "stoke's" or sunderland or "sunderland's" or truro or "truro's" or wakefield or "wakefield's" or wells or westminster or "westminster's" or winchester or "winchester's" or wolverhampton or "wolverhampton's" or (worcester not (massachusetts* or boston* or harvard*)) or ("worcester's" not (massachusetts* or boston* or harvard*)) or (york not ("new york*" or ny or ontario* or ont or toronto*)) or ("york's" not ("new york*" or ny or ontario* or ont or toronto*))))) OR AB (bath or "bath's" or ((birmingham not alabama*) or ("birmingham's" not alabama*) or bradford or "bradford's" or brighton or "brighton's" or bristol or "bristol's" or carlisle* or "carlisle's" or (cambridge not (massachusetts* or boston* or harvard*)) or ("cambridge's" not (massachusetts* or boston* or harvard*)) or (canterbury not zealand*) or ("canterbury's" not zealand*) or chelmsford or "chelmsford's" or chester or "chester's" or chichester or "chichester's" or coventry or "coventry's" or derby or "derby's" or (durham not (carolina* or nc)) or ("durham's" not (carolina* or nc)) or ely or "ely's" or exeter or "exeter's" or gloucester or "gloucester's" or hereford or "hereford's" or hull or "hull's" or lancaster or "lancaster's" or leeds* or leicester or "leicester's" or (lincoln not nebraska*) or ("lincoln's" not nebraska*) or (liverpool not (“new south wales*” or nsw)) or ("liverpool's" not (“new south wales*” or nsw)) or ((london not (ontario* or ont or toronto*)) or ("london's" not (ontario* or ont or toronto*)) or manchester or "manchester's" or (newcastle not (“new south wales*” or nsw)) or ("newcastle's" not (“new south wales*” or nsw)) or norwich or "norwich's" or nottingham or "nottingham's" or oxford or "oxford's" or peterborough or "peterborough's" or plymouth or "plymouth's" or portsmouth or "portsmouth's" or preston or "preston's" or ripon or "ripon's" or salford or "salford's" or salisbury or "salisbury's" or sheffield or "sheffield's" or southampton or "southampton's" or “st albans” or stoke or "stoke's" or sunderland or "sunderland's" or truro or "truro's" or wakefield or "wakefield's" or wells or westminster or "westminster's" or winchester or "winchester's" or wolverhampton or "wolverhampton's" or (worcester not (massachusetts* or boston* or harvard*)) or ("worcester's" not (massachusetts* or boston* or harvard*)) or (york not ("new york*" or ny or ontario* or ont or toronto*)) or ("york's" not ("new york*" or ny or ontario* or ont or toronto*))))) OR AF (bath or "bath's" or ((birmingham not alabama*) or ("birmingham's" not alabama*) or bradford or "bradford's" or brighton or "brighton's" or bristol or "bristol's" or carlisle* or "carlisle's" or (cambridge not (massachusetts* or boston* or harvard*)) or ("cambridge's" not (massachusetts* or boston* or harvard*)) or (canterbury not zealand*) or ("canterbury's" not zealand*) or chelmsford or "chelmsford's" or chester or "chester's" or chichester or "chichester's" or coventry or "coventry's" or derby or "derby's" or (durham not (carolina* or nc)) or ("durham's" not (carolina* or nc)) or ely or "ely's" or exeter or "exeter's" or gloucester or "gloucester's" or hereford or "hereford's" or hull or "hull's" or lancaster or "lancaster's" or leeds* or leicester or "leicester's" or (lincoln not nebraska*) or ("lincoln's" not nebraska*) or (liverpool not (“new south wales*” or nsw)) or ("liverpool's" not (“new south wales*” or nsw)) or ((london not (ontario* or ont or toronto*)) or ("london's" not (ontario* or ont or toronto*)) or manchester or "manchester's" or (newcastle not (“new south wales*” or nsw)) or ("newcastle's" not (“new south wales*” or nsw)) or norwich or "norwich's" or nottingham or "nottingham's" or oxford or "oxford's" or peterborough or "peterborough's" or plymouth or "plymouth's" or portsmouth or "portsmouth's" or preston or "preston's" or ripon or "ripon's" or salford or "salford's" or salisbury or "salisbury's" or sheffield or "sheffield's" or southampton or "southampton's" or “st albans” or stoke or "stoke's" or sunderland or "sunderland's" or truro or "truro's" or wakefield or "wakefield's" or wells or westminster or "westminster's" or winchester or "winchester's" or wolverhampton or "wolverhampton's" or (worcester not (massachusetts* or boston* or harvard*)) or ("worcester's" not (massachusetts* or boston* or harvard*)) or (york not ("new york*" or ny or ontario* or ont or toronto*)) or ("york's" not ("new york*" or ny or ontario* or ont or toronto*))))) |
| 16 | TI (bangor or "bangor's" or cardiff or "cardiff's" or newport or "newport's" or “st asaph” or "st asaph's" or “st davids” or swansea or "swansea's") OR AB (bangor or "bangor's" or cardiff or "cardiff's" or newport or "newport's" or “st asaph” or "st asaph's" or “st davids” or swansea or "swansea's") OR AF (bangor or "bangor's" or cardiff or "cardiff's" or newport or "newport's" or “st asaph” or "st asaph's" or “st davids” or swansea or "swansea's") |
| 17 | TI (aberdeen or "aberdeen's" or dundee or "dundee's" or edinburgh or "edinburgh's" or glasgow or "glasgow's" or inverness or (perth not australia*) or ("perth's" not australia*) or stirling or "stirling's") OR AB (aberdeen or "aberdeen's" or dundee or "dundee's" or edinburgh or "edinburgh's" or glasgow or "glasgow's" or inverness or (perth not australia*) or ("perth's" not australia*) or stirling or "stirling's") OR AF (aberdeen or "aberdeen's" or dundee or "dundee's" or edinburgh or "edinburgh's" or glasgow or "glasgow's" or inverness or (perth not australia*) or ("perth's" not australia*) or stirling or "stirling's") |
| 18 | TI (armagh or "armagh's" or belfast or "belfast's" or lisburn or "lisburn's" or londonderry or "londonderry's" or derry or "derry's" or newry or "newry's") OR AB (armagh or "armagh's" or belfast or "belfast's" or lisburn or "lisburn's" or londonderry or "londonderry's" or derry or "derry's" or newry or "newry's") OR AF (armagh or "armagh's" or belfast or "belfast's" or lisburn or "lisburn's" or londonderry or "londonderry's" or derry or "derry's" or newry or "newry's") |
| 19 | S11 OR S12 OR S13 OR S14 OR S15 OR S16 OR S17 OR S18 |
| 20 | (MH “africa+” or MH “americas+” or MH “antarctic regions+” or MH “arctic regions+” or MH “asia+” or MH “Australia+” or MH “oceania+”) not (MH “United Kingdom+” or “Europe+”) |
| 21 | S19 not S20 |
| 22 | S21 AND S10 |
| 23 | S22 AND PY >2000 |

NB: keyword searching not an option.

**Database:**
HMIC Health Management Information Consortium <1979 to July 2021>

| **#** | **Query** |
| --- | --- |
| 1 | exp health service staff/ |
| 2 | ("allied health" or anesthetist* or "health service" or "health facilit*" or audiologist* or caregiver* or "case manager*" or doulas or "medical faculty" or "nursing faculty" or "health facility" or administrator* or "infection control" or "medical chaperone*" or "medical staff" or nurse* or "nursing staff" or nutritionist* or "occupational therapist*" or optometrist* or "hospital personnel" or pharmacist* or "physical therapist*" or physician* or doctor* or clinician* or practitioner*).tw. |
| 3 | 1 or 2 |
| 4 | (("allied health" or anesthetist* or "health service" or "health facilit*" or audiologist* or caregiver* or "case manager*" or doulas or "medical faculty" or "nursing faculty" or "health facility" or administrator* or "infection control" or "medical chaperone*" or "medical staff" or nurse* or "nursing staff" or nutritionist* or "occupational therapist*" or optometrist* or "hospital personnel" or pharmacist* or "physical therapist*" or physician* or doctor* or clinician* or practitioner*) adj3 complaint*).tw. |
| 5 | ((respon* or resolv* or resolution* or manag* or handl* or "deal* with") adj3 complaint*).tw. |
| 6 | exp Complaints/ or exp Patient complaints/ |
| 7 | grievance.mp. [mp=title, other title, abstract, heading words] |
| 8 | 5 or 6 or 7 |
| 9 | 3 and 8 |
| 10 | 4 or 9 |
| 11 | exp United Kingdom/ |
| 12 | (national health service* or nhs*).ti,ab,tw. |
| 13 | (english not ((published or publication* or translat* or written or language* or speak* or literature or citation*) adj5 english)).ti,ab. |
| 14 | (gb or "g.b." or britain* or (british* not "british columbia") or uk or "u.k." or united kingdom* or (england* not "new england") or northern ireland* or northern irish* or scotland* or scottish* or ((wales or "south wales") not "new south wales") or welsh*).ti,ab,jw,mp. |
| 15 | (bath or "bath's" or ((birmingham not alabama*) or ("birmingham's" not alabama*) or bradford or "bradford's" or brighton or "brighton's" or bristol or "bristol's" or carlisle* or "carlisle's" or (cambridge not (massachusetts* or boston* or harvard*)) or ("cambridge's" not (massachusetts* or boston* or harvard*)) or (canterbury not zealand*) or ("canterbury's" not zealand*) or chelmsford or "chelmsford's" or chester or "chester's" or chichester or "chichester's" or coventry or "coventry's" or derby or "derby's" or (durham not (carolina* or nc)) or ("durham's" not (carolina* or nc)) or ely or "ely's" or exeter or "exeter's" or gloucester or "gloucester's" or hereford or "hereford's" or hull or "hull's" or lancaster or "lancaster's" or leeds* or leicester or "leicester's" or (lincoln not nebraska*) or ("lincoln's" not nebraska*) or (liverpool not (new south wales* or nsw)) or ("liverpool's" not (new south wales* or nsw)) or ((london not (ontario* or ont or toronto*)) or ("london's" not (ontario* or ont or toronto*)) or manchester or "manchester's" or (newcastle not (new south wales* or nsw)) or ("newcastle's" not (new south wales* or nsw)) or norwich or "norwich's" or nottingham or "nottingham's" or oxford or "oxford's" or peterborough or "peterborough's" or plymouth or "plymouth's" or portsmouth or "portsmouth's" or preston or "preston's" or ripon or "ripon's" or salford or "salford's" or salisbury or "salisbury's" or sheffield or "sheffield's" or southampton or "southampton's" or st albans or stoke or "stoke's" or sunderland or "sunderland's" or truro or "truro's" or wakefield or "wakefield's" or wells or westminster or "westminster's" or winchester or "winchester's" or wolverhampton or "wolverhampton's" or (worcester not (massachusetts* or boston* or harvard*)) or ("worcester's" not (massachusetts* or boston* or harvard*)) or (york not ("new york*" or ny or ontario* or ont or toronto*)) or ("york's" not ("new york*" or ny or ontario* or ont or toronto*))))).ti,ab,mp. |
| 16 | (bangor or "bangor's" or cardiff or "cardiff's" or newport or "newport's" or st asaph or "st asaph's" or st davids or swansea or "swansea's").ti,ab,mp. |
| 17 | (aberdeen or "aberdeen's" or dundee or "dundee's" or edinburgh or "edinburgh's" or glasgow or "glasgow's" or inverness or (perth not australia*) or ("perth's" not australia*) or stirling or "stirling's").ti,ab,mp. |
| 18 | (armagh or "armagh's" or belfast or "belfast's" or lisburn or "lisburn's" or londonderry or "londonderry's" or derry or "derry's" or newry or "newry's").ti,ab,mp. |
| 19 | 11 or 12 or 13 or 14 or 15 or 16 or 17 or 18 |
| 20 | (exp africa/ or exp americas/ or exp antarctic regions/ or exp arctic regions/ or exp asia/ or exp australia/ or exp oceania/) not (exp United Kingdom/ or europe/) |
| 21 | 19 not 20 |
| 22 | 10 and 21 |
