# Supplementary material for: Understanding healthcare professionals’ responses to patient complaints in secondary and tertiary care in the UK: A systematic review and behavioural analysis
Source: Research Square preprint supplement (doi:10.21203/rs.3.rs-3193937/v1), 2023-11-20
Supplement: Supplementary file 2 [file b18f797895d468335a74ca10.docx]

| **Supplementary File 2:** **Quality Assessment of included studies for the systematic review****Quality assessment of included studies using the MMAT** | | | | | | | | | | | | | | | | | |
| --- | --- | --- | --- | --- | --- | --- | --- | --- | --- | --- | --- | --- | --- | --- | --- | --- | --- |
|  | Screening Questions | | Qualitative | | | | | Quantitative | | | | | Mixed methods | | | | |
| Studies | Sqjkljlkjkljlk |  | 1.1. Is the qualitative approach appropriate to answer the research question? | 1.2.  Are the qualitative data collection methods adequate to address the research question? | 1.3.  Are the findings adequately derived from the data? | 1.4.  Is the interpretation of results sufficiently substantiated by data? | 1.5.  Is there coherence between qualitative data sources, collection, analysis and interpretation? | 4.1. Is the sampling strategy relevant to address the research question? | 4.2.  Is the sample representative of the target population? | 4.3.  Are the measurements appropriate? | 4.4. Is the risk of nonresponse bias low? | 4.5.  Is the statistical analysis appropriate to answer the research question? | 5.1.  Is there an adequate rationale for using a mixed methods design to address the research question? | 5.2. Are the different components of the study effectively integrated to answer the research question? | 5.3. Are the outputs of the integration of qualitative and quantitative components adequately interpreted? | 5.4. Are divergences and inconsistencies between quantitative and qualitative results adequately addressed? | 5.5. Do the different components of the study adhere to the quality criteria of each tradition of the methods involved? |
| Abbott 2005[1] | Y | Y | yes | yes | yes | yes | yes | N/A | N/A | N/A | N/A | N/A | N/A | N/A | N/A | N/A | N/A |
| Adams 2018[2] | Y | Y | yes | Yes | yes | yes | yes | N/A | N/A | N/A | N/A | N/A | N/A | N/A | N/A | N/A | N/A |
| Allan 2015[3] | Y | Y | yes | yes | yes | yes | yes | N/A | N/A | N/A | N/A | N/A | N/A | N/A | N/A | N/A | N/A |
| Allan 2015[4] | Y | Y | yes | yes | yes | yes | yes | N/A | N/A | N/A | N/A | N/A | N/A | N/A | N/A | N/A | N/A |
| Balasubramaniam 2012[5] (conference abstract) | Y | Y | N/A | N/A | N/A | N/A | N/A | yes | yes | Unclear | Unclear | Unclear | N/A | N/A | N/A | N/A | N/A |
| Behavioural Insights Team (BIT) Report 2018[6] | Y | Y | yes | yes | yes | yes | yes | yes | yes | yes | yes | yes | yes | yes | yes | yes | yes |
| Bolton 2018[7] | Y | Y | N/A | N/A | N/A | N/A | N/A | yes | yes | Yes | Unclear | Yes | N/A | N/A | N/A | N/A | N/A |
| Bourne 2017[8] | Y | Y | N/A | N/A | N/A | N/A | N/A | Yes | yes | yes | yes | yes | N/A | N/A | N/A | N/A | N/A |
| Bourne 2016[9] | Y | Y | yes | yes | yes | yes | yes | N/A | N/A | N/A | N/A | N/A | N/A | N/A | N/A | N/A | N/A |
| Bourne 2015[10] | Y | Y | N/A | N/A | N/A | N/A | N/A | Yes | yes | yes | yes | yes | N/A | N/A | N/A | N/A | N/A |
| Burr 2008[11] | Y | Y | yes | yes | yes | yes | yes | Yes | yes | yes | yes | yes | Yes | Yes | Yes | Unclear | Yes |
| Cooke 2007[12] | Y | Y | yes | yes | yes | yes | yes | N/A | N/A | N/A | N/A | N/A | N/A | N/A | N/A | N/A | N/A |
| Hutchinson 2001[13] | Y | Y | yes | yes | yes | yes | yes | yes | yes | yes | yes | yes | yes | yes | yes | Yes | yes |
| McCreaddie 2021[14] | Y | Y | yes | yes | yes | Yes | Yes | N/A | N/A | N/A | N/A | N/A | N/A | N/A | N/A | N/A | N/A |
| NHS 2017[15] | Y | Y | N/A | N/A | N/A | N/A | N/A | Unclear | yes | yes | Yes | Yes | N/A | N/A | N/A | N/A | N/A |
| Odelius 2015[16] | Y | Y | Yes | Yes | Yes | Yes | Yes | N/A | N/A | N/A | N/A | N/A | N/A | N/A | N/A | N/A | N/A |
| Robinson 2014[17] | Y | Y | N/A | N/A | N/A | N/A | N/A | yes | yes | yes | yes | Unclear | N/A | N/A | N/A | N/A | N/A |
| Siyambalapitiya 2007[18] | Y | Y | N/A | N/A | N/A | N/A | N/A | yes | yes | yes | yes | Unclear | N/A | N/A | N/A | N/A | N/A |
| Treanor 2014[19] | Y | Y | yes | yes | yes | Yes | Yes | Unclear | Yes | Yes | Unclear | Unclear | yes | yes | yes | yes | Unclear |
| Xanthos 2008[20] | Y | Y | yes | yes | yes | yes | yes | N/A | N/A | N/A | N/A | N/A | N/A | N/A | N/A | N/A | N/A |

NB: Yes, quality criteria met; No, quality criteria not met; N/A, quality criteria did not apply due to the study design; Unclear: insufficient info to assess criterion.

None of the included studies used a quantitative randomized controlled trial or quantitative non-randomized method hence criteria 2.1–2.5 and 3.1–3.5 were not included in the table.

**JBI critical appraisal checklist for text and opinion papers**

| Studies | Q1.  Is the source of the opinion clearly identified? | Q2.  Does the source of opinion have standing in the field of expertise? | Q3  Are the interests of the relevant population the central focus of the opinion? | Q4.  Is the stated position the result of an analytical process, and is there logic in the opinion expressed? | Q5  Is there reference to the extant literature? | Q6.  Is any incongruence with the literature/sources logically defended? | Overall appraisal – include? |
| --- | --- | --- | --- | --- | --- | --- | --- |
| Abraham 2004[21] | Yes | Yes | Yes | Yes | No | N/A | Include |
| Scott 2006[22] | Yes | Unclear | Yes | Yes | Yes | Yes | Include |
| Tingle 2018[23] | Yes | Yes | Yes | Yes | Yes | Yes | Include |
| Xanthos 2005[24] | Yes | Yes | Yes | Yes | Yes | Yes | Include |

NB: Yes, quality criteria met; No, quality criteria not met; N/A, quality criteria did not apply due to the study design; Unclear: insufficient info to assess criterion.

References

1. Abbott, S., et al., *Quality criteria for patient advice and liaison services: what do patients and the public want?* Health Expectations, 2005. **8**(2): p. 126-137.

2. Adams, M., J. Maben, and G. Robert, *‘It’s sometimes hard to tell what patients are playing at’: How healthcare professionals make sense of why patients and families complain about care.* Health, 2018. **22**(6): p. 603-623.

3. Allan, H.T., et al., *Supporting staff to respond effectively to informal complaints: findings from an action research study.* Journal of Clinical Nursing, 2015. **24**(15-16): p. 2106-2114.

4. Allan, H.T., et al., *Gatekeeping access to the midwifery unit: Managing complaints by bending the rules.* Health:, 2015. **19**(6): p. 652-669.

5. Balasubramaniam, M.S., Z. Mohmed, and M. Purva, *How prepared are we in handling complaints from patients?* Anaesthesia, 2012. **67**.

6. Team, B.I., *Behavioural insights into patientmotivation to make a claim for clinical negligence*. 2018, NHS Resolution.

7. Bolton, C. and P. Goldsmith, *Complaints from patients with functional neurological disorders: a cross-sectional UK survey of why patients complain and the effect on the clinicians who look after them.* BMJ open, 2018. **8**(11): p. e021573.

8. Bourne, T., et al., *Doctors’ perception of support and the processes involved in complaints investigations and how these relate to welfare and defensive practice: a cross-sectional survey of the UK physicians.* BMJ open, 2017. **7**(11): p. e017856.

9. Bourne, T., et al., *Doctors' experiences and their perception of the most stressful aspects of complaints processes in the UK: an analysis of qualitative survey data.* BMJ open, 2016. **6**(7): p. e011711.

10. Bourne, T., et al., *The impact of complaints procedures on the welfare, health and clinical practise of 7926 doctors in the UK: a cross-sectional survey.* BMJ open, 2015. **5**(1): p. e006687.

11. Burr, T., *Feeding Back?: Learning from Complaints Handling in Health and Social Care*. 2008, National Audit Office.

12. Cooke, H., *" Out there, you're on a stage": complaints and the management of emotion work in nursing.* International Journal of Work Organisation and Emotion, 2007. **2**(2): p. 145-160.

13. Hutchinson, A., et al., *Senior health professional’s perceptions of variations in medical practice: a qualitative and quantitative study.* Medical Education, 2001. **35**: p. 45-51.

14. McCreaddie, M., B. Benwell, and A. Gritti, *A qualitative study of National Health Service (NHS) complaint-responses.* BMC Health Services Research, 2021. **21**(1): p. 1-11.

15. Workforce, N.D., *Data on written complaints in the NHS*. 2017.

16. Odelius, A., et al., *From transformative learning to social change? Using action research to explore and improve informal complaints management in an NHS trust.* International practice development journal, 2015. **5**(1).

17. Robinson, L., et al., *A 36-month study of patient complaints at a tertiary fertility centre.* Human Fertility, 2014. **17**(1): p. 45-49.

18. Siyambalapitiya, S., et al., *A 22 month study of patient complaints at a National Health Service hospital.* International journal of nursing practice, 2007. **13**(2): p. 107-110.

19. Treanor, J., *HOW TO DEVELOP BETTER PRACTICE IN RESPONSE TO PATIENTS'COMPLAINTS.* Nursing Management-UK, 2014. **21**(1).

20. Xanthos, C. *Conflicting obligations: role conflict among health care complaints managers*. in *Forum Qualitative Sozialforschung/Forum: Qualitative Social Research*. 2008.

21. Abraham, A., *Lack of communication affects the care of patients and families.* Professional Nurse (London, England), 2004. **19**(6): p. 351-353.

22. Scott, H., *The so-called" vexatious complaint": problems and solutions.* HEALTH CARE RISK REPORT, 2006. **12**(5): p. 22.

23. Tingle, J., *Poor communication and an opaque complaints process.* British Journal of Nursing, 2018. **27**(22): p. 1338-1339.

24. Xanthos, C., *Conflicts and tensions in the role of NHS complaints managers*. 2005. p. 14-15.
